# Supplementary material for: Public Health Interventions to Address Housing and Mental Health amongst Migrants from Culturally and Linguistically Diverse Backgrounds Living in High-Income Countries: A Scoping Review
Source: MDPI journal article supplement (doi:10.3390/ijerph192416946), 2022-12-16
Supplement: s1 [file s1]

**Table S1:** Studies included in the scoping review

| Author/ Year/ Country                            | Aim                                                                                                                                        | Participants/Sample size (SS)/Response rate (RR)                                                                                                                                                                                            | Cultural and Linguistic categorization                                | Evaluation/Research Design/Methods                                                                                                                                                                                                    | Intervention type/Duration                                                                                                                                                                                       | Outcome measures                                                                                                                                                                                                                     |
|--------------------------------------------------|--------------------------------------------------------------------------------------------------------------------------------------------|---------------------------------------------------------------------------------------------------------------------------------------------------------------------------------------------------------------------------------------------|-----------------------------------------------------------------------|---------------------------------------------------------------------------------------------------------------------------------------------------------------------------------------------------------------------------------------|------------------------------------------------------------------------------------------------------------------------------------------------------------------------------------------------------------------|--------------------------------------------------------------------------------------------------------------------------------------------------------------------------------------------------------------------------------------|
| Adair et al. (2017) [80]<br><br>Canada           | Examine predictors of outcome trajectories in terms of housing stability for people in Housing First.                                      | Participants: Adults 18 years or older, absolutely or precariously housed, with mental health and/or substance use disorder.<br>SS: 2140<br>RR: 84% (24 months).                                                                            | Ethnicity.                                                            | Study type: Randomized controlled trial.<br>Data collection: Baseline; 3 monthly.<br>Collection method: Interview.<br>Ethical approval: Yes                                                                                           | Intervention: Housing First.<br>Duration: 24-months.                                                                                                                                                             | Primary outcome: Housing stability.<br>Predictive factors: Mental health, childhood trauma, self-esteem/ self-efficacy, cognitive impairment.                                                                                        |
| Aubry et al. (2015) [81]<br><br>Canada           | Explore efficacy of Housing First with assertive community treatment.                                                                      | Participants: Adults with mental illness experiencing homelessness.<br>SS: 950.<br>RR: 90% (12-months).                                                                                                                                     | Racial-ethnic minority status.                                        | Study type: Randomized control trial.<br>Data collection: Baseline; 3 monthly (housing) 6- and 12-months.<br>Collection method: Interviews; housing history.<br>Ethical approval: Yes                                                 | Intervention: Housing First.<br>Duration: 12-months.                                                                                                                                                             | Housing stability, quality of life, psychiatric symptoms; substance use; community functioning.                                                                                                                                      |
| Aubry et al. (2016) [82]<br><br>Canada           | Explore longer-term efficacy of Housing First with assertive community treatment.                                                          | Participants: Adults with mental illness experiencing homelessness.<br>SS: 950.<br>RR: 82%.                                                                                                                                                 | Ethno-racial status.                                                  | Study type: Randomized controlled trial.<br>Data collection: Baseline; 6-monthly for 21 or 24 months.<br>Collection method: Interviews.<br>Ethical approval: Yes                                                                      | Intervention: Housing First.<br>Duration: 24-month.                                                                                                                                                              | Primary outcomes: housing stability, community functioning.<br>Secondary outcomes: health status, mental health status, quality of life and integration, substance use, hospitalisations, emergency department attendances, arrests. |
| Aubry et al. (2019) [83]<br><br>Canada           | Examine effectiveness of Housing First programs with assertive community treatment for people experiencing serious psychiatric conditions. | Participants: Adults 18 years or older; experiencing homelessness and mental illness.<br>SS: 201<br>RR: 84%                                                                                                                                 | Ethno-cultural identity.                                              | Study type: Randomized control trial.<br>Data collection: Telephone interviews at 3, 9, 15 and 21 months; In-person interviews at 6, 12, 18 and 21 or 24 months.<br>Ethical approval: Yes                                             | Intervention: Housing First with assertive community treatment.<br>Duration: 24-months.                                                                                                                          | Primary outcomes: Housing stability, community functioning.<br>Secondary outcomes: health measures, quality of life, community integration, substance use, recovery.                                                                 |
| Collins et al. (2013) [65]<br><br>United States  | Explore accommodation retention in a Housing First program for people experiencing long-term homelessness with severe alcohol problems.    | Participants: People experiencing chronic homelessness and severe alcohol problems from a Housing First program.<br>SS: 111.<br>RR: 46%                                                                                                     | Race/Ethnicity.                                                       | Study type: Non-randomized control trial.<br>Data collection: Baseline; across 2 years.<br>Collection method: self-report measures, housing status.<br>Ethical approval: Yes                                                          | Intervention: Housing First single-site.<br>Duration: 24-months.                                                                                                                                                 | Interest in housing, housing retention, substance use, mental health, physical health, demographic characteristics.                                                                                                                  |
| Dwyer & Brown (2008) [54]<br><br>United Kingdom  | Examine issues related to housing and susceptibility of dispersed forced migrants to homelessness.                                         | Participants: Dispersed forced migrants, living in the UK.<br>SS: 34<br>RR: 100%.                                                                                                                                                           | Migration status; Country of birth.                                   | Study type: Qualitative – no design stated.<br>Collection method: Interviews; Focus groups.<br>Ethical approval: Not recorded.                                                                                                        | Intervention: Migration status.                                                                                                                                                                                  | Housing stability, adequacy of government and privately provided housing, standard of accommodation and housing-related support, impact of changes in socio-legal status, risk of homelessness.                                      |
| Gewitz et al. (2009) [55]<br><br>United States   | Explore associations between parenting, child adjustment and parent mental health in formerly homeless families in supportive housing.     | Participants: Families with 6–12-year-old children, previously experiencing homelessness, living in supportive housing communities, in two USA cities.<br>RR: 100%                                                                          | Formal classification not used ( <i>Multiracial, minority</i> ).      | Study type: Randomized control trial.<br>Collection method: Interview; Self-assessment; Observation.<br>Ethical approval: Yes                                                                                                         | Intervention: Supportive housing.                                                                                                                                                                                | Parental mental health, parenting self-efficacy, parenting practices (various measures), child adjustment.<br>Control variables: child age, parent income, education.                                                                |
| Gilmer et al. (2010) [66]<br><br>United States   | Examine the impact of Full-Service Partnerships on recovery, use of mental health services and costs, and quality of life.                 | Participants: Adults experiencing chronic homelessness living with severe mental illness.<br>SS: 363.<br>RR: 100%                                                                                                                           | Race/Ethnicity.                                                       | Study type: Quasi-experimental, difference-in-difference design.<br>Ethical approval: Yes                                                                                                                                             | Intervention: Full-service Partnership (partly funded permanent housing and support services).<br>Duration: 32-months.                                                                                           | Recovery outcomes, health, mental health service utilization, justice system use, associated expenses.                                                                                                                               |
| Gilmer et al. (2014) [67]<br><br>United States   | Examine impact of Full-Service Partnerships on health service use and costs, compared with usual care.                                     | Participants: People experiencing serious psychiatric illness and homelessness or at risk of homelessness.<br>SS: 20,462.<br>RR: not reported.                                                                                              | Race-Ethnicity.                                                       | Study type: Quasi-experimental, pre-post, intent-to-treat design.<br>Collection method: Data from the Client and Services Information system; Medi-Cal Short Doyle; Inpatient Fee-for-Service Consolidation.<br>Ethical approval: Yes | Intervention: Full-service Partnerships (partly funded permanent housing and support services).                                                                                                                  | Mental health service utilization and costs                                                                                                                                                                                          |
| Gulcur et al. (2003) [56]<br><br>United States   | Compare outcomes of Housing First and Continuum of Care for people with serious mental illnesses and dual diagnoses.                       | Participants: Street present groups, who were in psychiatric hospitals prior to study entry.<br>SS: 225.<br>RR: 96% (6 months), 90% (24 months).                                                                                            | Race.                                                                 | Study type: Randomized control trial.<br>Data collection: Baseline; 6-monthly.<br>Collection method: Interviews.<br>Ethical approval: Yes                                                                                             | Intervention: Housing First.<br>Duration: 24-months.                                                                                                                                                             | Residential location, accommodation costs.                                                                                                                                                                                           |
| Guo et al. (2016) [68]<br><br>United States      | Document mental health outcomes associated with Ecologically Based Treatment.                                                              | Participants: Women experiencing homelessness, caring for a biological child aged 2–6 years, with substance abuse or dependence disorder.<br>SS: 60.<br>RR: 100% (Ecologically Based Treatment group), 80% (usual service provision group). | Race/Ethnicity.                                                       | Study type: Randomized control trial.<br>Data collection: Baseline; 3, 6, 9-months post.<br>Collection method: Range of forms.<br>Ethical approval: Yes                                                                               | Intervention: Ecologically Based Treatment.<br>Duration: 9-months.                                                                                                                                               | Substance use and dependence, physical health, mental health, self-efficacy, intimate partner violence, child behaviours.                                                                                                            |
| Hanrahan et al. (2005) [57]<br><br>United States | Describe qualities of mothers experiencing homelessness participating in the Mothers’ Project and program achievements.                    | Participants: Mothers with a history of homelessness and mental illness, participating in the Thresholds’ Mothers’ Project from 1996-2002.<br>SS: 24.<br>RR: 92% (6 months), 79% (12 months).                                               | Formal classification not used ( <i>European-American, Hispanic</i> ) | Study type: Retrospective chart review.<br>Data collection: intake; 6, 12 months post.<br>Ethical approval: Not recorded.                                                                                                             | Intervention: Thresholds’ Mothers’ Project (psychosocial rehabilitation and intensive care management, mental and physical health services, primary intervention services for children).<br>Duration: 12-months. | Primary outcome: Residential status.<br>Other outcomes: hospital stays, judicial outcomes, substance use, child progress, custody.                                                                                                   |

| Author/ Year/ Country                                   | Aim                                                                                                                                                                                       | Participants/Sample size (SS)/Response rate (RR)                                                                                                                                                   | Cultural and Linguistic categorization           | Evaluation/Research Design/Methods                                                                                                                                                                                                          | Intervention type/Duration                                                              | Outcome measures                                                                                                                                                                                                                                        |
|---------------------------------------------------------|-------------------------------------------------------------------------------------------------------------------------------------------------------------------------------------------|----------------------------------------------------------------------------------------------------------------------------------------------------------------------------------------------------|--------------------------------------------------|---------------------------------------------------------------------------------------------------------------------------------------------------------------------------------------------------------------------------------------------|-----------------------------------------------------------------------------------------|---------------------------------------------------------------------------------------------------------------------------------------------------------------------------------------------------------------------------------------------------------|
| Harris et al. (2019) [69]<br><br>United States          | Examine impact of supportive housing models and neighbourhoods on social integration outcome.                                                                                             | Participants: Supportive housing residents, 39 years old or older, English or Spanish speaking, currently without a home, without minor children.<br>SS: 405.<br>RR: 100%                          | Race.                                            | Study type: Longitudinal.<br>Data collection: Baseline; 3-months post.<br>Collection method: Questionnaire; Interviews.<br>Ethical approval: Yes                                                                                            | Intervention: Permanent Supportive Housing.<br>Duration: 12-months.                     | Housing model, neighbourhood, social networks, homelessness, mental health/ health/ substance use, demographics.                                                                                                                                        |
| Hwang et al. (2012) [84]<br><br>Canada                  | Explore and describe recruitment and engagement people involved in the At Home/ Chez Soi Housing First intervention.                                                                      | Participants: Adults experiencing homelessness and serious psychiatric illness, living in the Toronto area.<br>SS: 575.<br>RR: not reported.                                                       | Ethno-racial identity.                           | Study type: Randomized control trial.<br>Data collection: Baseline<br>Collection method: Questionnaires.<br>Ethical approval: Yes                                                                                                           | Intervention: Housing First.<br>Duration: 48-months.                                    | Age, gender, country of birth, language of origin, ethnic or cultural identity, marital status, number of children, homelessness status, education, employment, mental health status, functional and cognitive impairment, referral source.             |
| Karim et al. (2016) [100]<br><br>United Kingdom         | Understand mental health issues and parenting challenges in homeless families when first becoming homeless.                                                                               | Participants: Families, experiencing homelessness, in two homeless shelters.<br>SS: 81 families.<br>RR: 43%.                                                                                       | Ethnic status.                                   | Study type: Longitudinal.<br>Data collection: Baseline; 4 months post.<br>Collection method: Quantitative tools; Interviews.<br>Ethical approval: Not recorded.                                                                             | Intervention: Rehousing in the community.<br>Duration: 4-months.                        | Primary outcomes: parent and child mental health measures.<br>Parenting problems, and service satisfaction.                                                                                                                                             |
| Kirst et al. (2015) [85]<br><br>Canada                  | Explore impact of scatter-site Housing First on substance use outcomes.                                                                                                                   | Participants: Adults aged 18 or older, experiencing homelessness or housing precarity, living with a mental health issue with or without substance use.<br>SS: 575.<br>RR: 80% (24 months).        | Visible minority; Country of birth.              | Randomized control design.<br>Data collection: Baseline; 6, 12, 18, 24 months.<br>Ethical approval: Yes                                                                                                                                     | Intervention: Housing First.<br>Duration: 24-months.                                    | Primary outcome: Substance use.<br>Gender, age, minority status, country of birth, marital status, duration of homelessness, employment, education, chronic conditions, number of children.                                                             |
| Mejia-Lancheros et al. (2020) [86]<br><br>Canada        | Identify trajectories in relation to stigma and discrimination and mental health in homeless adults, and the effect of Housing First.                                                     | Participants: Adults, experiencing homelessness, taking part in the Toronto site of the AHCS Housing First study.<br>SS: 414.<br>RR: 99.0% (stigma trajectory), 97.6% (discrimination trajectory). | Ethno-racial status.                             | Study type: Randomized control trial.<br>Data collection: Baseline; 1, 2-years post.<br>Collection method: Interviews.<br>Ethical approval: Yes                                                                                             | Intervention: Housing First.<br>Duration: 24-months.                                    | Discrimination: The ‘Unfair treatment’ subscale of the Discrimination and Stigma Scale (DISC-12).<br>Stigma: 10-item Stigma Experiences Scale.<br>Mental health, substance use measures: discrimination in health scenarios because of health problems. |
| Murdie (2008) [58]<br><br>Canada                        | Assess whether more difficulty in accessing accommodation is experienced in refugee claimants or sponsored refugees.                                                                      | Participants: Sponsored refugees and refugee claimants in Toronto, Canada; Key informants.<br>SS: Exact numbers not provided.<br>RR: not reported.                                                 | Refugee status; Country of birth                 | Study type: Qualitative – specific design not stated.<br>Collection method: Interviews.<br>Ethical approval: Not recorded.                                                                                                                  | Intervention: Sponsored refugee experience compared to refugee claimant experience.     | Housing trajectories.<br>Initial housing experience, search for permanent accommodation, other accommodation outcomes (tenure, property type, rent), income, employment status.                                                                         |
| O’Campo et al. (2016) [87]<br><br>Canada                | Examine how Housing First creates changes in housing stability, justice system involvement, healthcare access and health outcomes in people experiencing homelessness and mental illness. | Participants: Adults experiencing homelessness and psychiatric conditions.<br>SS: 197.<br>RR: not reported.                                                                                        | Ethnicity or cultural identity; Country of birth | Study type: Randomized trial.<br>Data collection: 3-monthly.<br>Collection method: Interviews; Questionnaires.<br>Ethical approval: Yes                                                                                                     | Intervention: Housing First with assertive community treatment.<br>Duration: 24-months. | Primary outcome: Housing stability.<br>Secondary outcomes: quality of life, functional ability.<br>Exploratory outcomes: mental health symptom severity, substance use, community integration, health service and justice use.                          |
| Padgett, et al. (2006) [59]<br><br>United States        | Assess outcomes related to substance use and treatment in two groups - Housing First and treatment first.                                                                                 | Participants: People experiencing homelessness in New York City, with severe mental illness.<br>SS: 225.<br>RR: 35% (at 12 months).                                                                | Race.                                            | Study type: Longitudinal experimental study.<br>Data collection: 6-monthly for 48 months.<br>Collection method: Interviews.<br>Ethical approval: Yes                                                                                        | Intervention: Housing First and treatment first.<br>Duration: 48-months.                | Use of alcohol and other drugs, engagement in with treatment interventions.                                                                                                                                                                             |
| Padgett et al. (2011) [70]<br><br>United States         | Compare differences in substance use and treatment utilisation amongst individuals in either Housing First or Treatment First programs.                                                   | Participants: Adults experiencing homelessness, entering either program, with a DSM Axis-1, and history of substance use.<br>SS: 83.<br>RR: 90%                                                    | Race/Ethnicity.                                  | Study type: Qualitative.<br>Data collection: at 0-, 6-, 12-months; monthly<br>Collection method: Interviews; Phone calls.<br>Ethical approval: Yes                                                                                          | Intervention: Housing First.<br>Duration: 12-months.                                    | Substance use, treatment for substance abuse.                                                                                                                                                                                                           |
| Palepu et al. (2013) [88]<br><br>Canada                 | Investigate substance dependence and stability of accommodation stability in Housing First adults experiencing homelessness with mental health issues.                                    | Participants: Adults 19 years or older, experiencing homelessness or housing precarity, living with a current mental disorder.<br>SS: 497.<br>RR: 96%.                                             | Ethnicity.                                       | Study type: Randomized control trials.<br>Data collection: Baseline; 3-monthly.<br>Collection method: Interviews.<br>Ethical approval: Yes                                                                                                  | Intervention: Housing First.<br>Duration: 12-months.                                    | Primary outcome: Residential stability.<br>Primary independent variable: substance dependency.<br>Mental health symptoms and severities.                                                                                                                |
| Patterson et al. (2013) [89]<br><br>Canada              | Explore perceived quality of life in adults experiencing homelessness and mental health issues after receiving housing models.                                                            | Participants: Adults 19 years or older, experiencing homelessness or housing precarity, living with a current mental disorder.<br>SS: 497.<br>RR: 95%.                                             | Ethnicity.                                       | Study type: Randomized control trials.<br>Data collection: Baseline; 2, 6 months post.<br>Collection method: Questionnaires.<br>Ethical approval: Yes                                                                                       | Intervention: Housing First.<br>Duration: 12-months.                                    | Primary outcomes: Quality of life.<br>Other measures: mental illness, medical conditions, infectious disease, demographics.                                                                                                                             |
| Pilkauskas & Micelmore (2019) [53]<br><br>United States | Understand how Earned Income Tax Credits impact on housing and living circumstances of single mothers.                                                                                    | Participants: Single mothers in the USA receiving Earned Income Tax Credits.<br>SS: 853,012.<br>RR: 100%                                                                                           | Race/Ethnicity.                                  | Study type: Quasi-experimental study.<br>Collection method: Data from the Current Population Survey, the American Community Survey/decennial census, and the Fragile Families and Child Wellbeing Survey.<br>Ethical approval: Not recorded | Intervention: Earned Income Tax Credit.                                                 | Homelessness and eviction, cost burden, housing arrangements.                                                                                                                                                                                           |

| Author/ Year/ Country                                 | Aim                                                                                                                                                                                                                 | Participants/Sample size (SS)/Response rate (RR)                                                                                                                                                                             | Cultural and Linguistic categorization        | Evaluation/Research Design/Methods                                                                                                                                                   | Intervention type/Duration                                                                                                                                                                                                                                                                                                                               | Outcome measures                                                                                                                                                                                                                    |
|-------------------------------------------------------|---------------------------------------------------------------------------------------------------------------------------------------------------------------------------------------------------------------------|------------------------------------------------------------------------------------------------------------------------------------------------------------------------------------------------------------------------------|-----------------------------------------------|--------------------------------------------------------------------------------------------------------------------------------------------------------------------------------------|----------------------------------------------------------------------------------------------------------------------------------------------------------------------------------------------------------------------------------------------------------------------------------------------------------------------------------------------------------|-------------------------------------------------------------------------------------------------------------------------------------------------------------------------------------------------------------------------------------|
| Schueller et al. (2019) [71]<br><br>United States     | Determine feasibility, acceptability, and effects of a multicomponent mobile phone–based program for homeless adults.                                                                                               | Participants: English-speaking, young adults, aged between 18 and 24, currently experiencing homelessness and sleeping in a Chicago-based homeless shelter.<br>SS: 35.<br>RR: 66%.                                           | Race and Ethnicity.                           | Study type: Feasibility pilot trial.<br>Data collection: Baseline; 4 weeks.<br>Collection method: Self-report assessments.<br>Ethical approval: Yes                                  | Intervention: Mobile phone- based program for young adults.<br>Duration: 1 month.                                                                                                                                                                                                                                                                        | Feasibility, acceptability, mental health symptoms and self-reported changes in depression, PTSD, and emotional regulation.                                                                                                         |
| Schutt et al. (2009) [60]<br><br>United States        | Explore impact of housing, supports, and individual characteristics on housing loss among formerly homeless people with mental health conditions.                                                                   | Participants: Adults, experiencing homelessness and mental illness, across various sites in U.S.<br>SS: 894.<br>RR: 79%.                                                                                                     | Ethnicity.                                    | Study type: Randomized control trials.<br>Data collection: 18 month follow up.<br>Collection method: Interviews.<br>Ethical approval: Not recorded.                                  | Intervention: rental subsidy vouchers plus active community treatment or comprehensive case management; psychiatric rehabilitation services including outreach and housing respite; community housing with or without intensive treatment; and clinical case management with either group housing or individual apartments.<br>Duration: 12 – 24 months. | Housing outcomes, lifetime substance use, symptoms of mental illness.                                                                                                                                                               |
| Schwan et al. (2018) [90]<br><br>Canada               | Explore impacts of an art-based program in the lives of young people experiencing homeless.                                                                                                                         | Participants: Young people, aged 16-24, experiencing homelessness; Program staff.<br>SS: 23.<br>RR: 100%.                                                                                                                    | Ethnic/Cultural background.                   | Study type: Grounded theory.<br>Collection method: Interviews.<br>Ethical approval: Yes                                                                                              | Intervention: Arts-based programming at a homeless shelter.<br>Duration: 5-months.                                                                                                                                                                                                                                                                       | Young people’s conceptions of the value, and significance of art creation for them, the impacts attributed to artmaking and art program participation, and elements of the program viewed as effective.                             |
| Slesnick & Erdem (2013) [72]<br><br>United States     | Test impact of Ecologically Based Treatment for mothers facing homelessness and substance use, whilst caring for children.                                                                                          | Participants: Mothers experiencing homelessness, with children in their care.<br>SS: 60.<br>RR: 100% (intervention group).                                                                                                   | Ethnicity.                                    | Study type: Randomized control trial.<br>Data collection: Baseline; 3-, 6- 9-months post.<br>Collection method: Range of forms.<br>Ethical approval: Yes                             | Intervention: Ecologically Based Treatment.<br>Duration: 9-months.                                                                                                                                                                                                                                                                                       | Substance use, housing stability.                                                                                                                                                                                                   |
| Slesnick et al. (2015) [73]<br><br>United States      | Compare treatment outcomes for young people with substance use disorder between three different intervention approaches.                                                                                            | Participants: Young people experiencing homelessness and substance use disorder, living in Ohio.<br>SS: 270.<br>RR: 75% (3 months), 76% (12 months).                                                                         | Ethnicity.                                    | Randomized control trial.<br>Ethical approval: Yes                                                                                                                                   | Intervention: Community reinforcement, motivational enhancement therapy and case management.<br>Duration: 12-months.                                                                                                                                                                                                                                     | Primary outcomes: substance use including alcohol.<br>Secondary outcomes: depression symptoms, internalising/externalising problems, victimisation, homelessness, coping.                                                           |
| Somers et al (2013) [91]<br><br>Canada                | Describe recruitment of two samples of people experiencing homelessness and mental illness with different complexity of needs.                                                                                      | Participants: Adults 19 years or older, experiencing homelessness or housing precarity, living in Vancouver, with a current mental disorder.<br>SS: 497.<br>RR: 97%.                                                         | Ethnicity; Country of birth.                  | Study type: Randomized control trials.<br>Data collection: 3-monthly for 2 years,<br>Collection method: Interviews; Administrative data.<br>Ethical approval: Yes                    | Intervention: Housing First.<br>Duration: 24-months.                                                                                                                                                                                                                                                                                                     | Housing and vocational status, mental and physical health, community integration and functioning, quality of life, level of community service use.                                                                                  |
| Somers et al. (2015) [92]<br><br>Canada               | Compare daily substance use in Housing First compared to usual service provision.                                                                                                                                   | Participants: Adults 19 years or older, experiencing homelessness or housing precarity, living in Vancouver, with a current mental disorder.<br>SS: 497.<br>RR: 90.1% (12 months), 79.3% (24 months).                        | Ethnicity.                                    | Study type: Randomized control trials.<br>Data collection: Baseline; 6-monthly.<br>Collection method: Interviews.<br>Ethical approval: Yes                                           | Intervention: Housing First.<br>Duration: 24-months.                                                                                                                                                                                                                                                                                                     | Primary outcome: Daily substance use.<br>Demographics, homelessness history, psychiatric diagnosis, symptom severity, comorbidity, duration of stable housing.                                                                      |
| Stefanic & Tsemberis (2007) [61]<br><br>United States | Document housing retention and status and cost-effectiveness of Housing First programs for chronically homeless people with mental health problems.                                                                 | Participants: People with mental illness using shelters on a long-term basis.<br>SS: 260<br>RR: Not reported.                                                                                                                | Race.                                         | Study type: Randomized control trial.<br>Collection method: Data from administrative records from a government agency and Housing First agencies.<br>Ethical approval: Not recorded. | Intervention: Housing First, provided by two different agencies.<br>Duration: 48-months.                                                                                                                                                                                                                                                                 | Housing status, housing retention, housing service costs.                                                                                                                                                                           |
| Stergiopoulos et al. (2012) [97]<br><br>Canada        | Present early implementation and fidelity evaluation of a novel Housing First Ethno-Racial Intensive Case Management model, designed to meet needs of homeless people with mental illness from ethno-racial groups. | Participants: People from a defined ethno-racial group taking part in the At Home/Chez Soi Research Demonstration Project in Homelessness and Mental Health.<br>SS: 204 (intervention), 93 (evaluation)<br>RR: Not reported. | Ethnic or cultural identity; Country of birth | Study type: Randomized control trial.<br>Collection method: Interviews; Focus groups; Observation; Document review.<br>Ethical approval: Yes                                         | Intervention: Housing First Ethno-Racial Intensive Case Management model.                                                                                                                                                                                                                                                                                | Demographics, mental illness diagnoses and extent of community functioning.<br>Fidelity: 1) housing choice and structure; 2) separation of housing and services; 3) service philosophy; 4) service array; and 5) program structure. |
| Stergiopoulos et al. (2015) [93]<br><br>Canada        | Evaluate effectiveness of Housing First with Intensive Case Management amongst ethnically diverse adults experiencing homelessness.                                                                                 | Participants: Adults experiencing homelessness or housing precarity and mental illness, living in Toronto.<br>SS: 378.<br>RR: 92% (12 months), 85% (24-months).                                                              | Ethnic or cultural identity; Country of birth | Study type: Randomized control trial.<br>Data collection: 3-monthly.<br>Collection method: Interviews.<br>Ethical approval: Yes                                                      | Intervention: Housing First with Intensive Case Management.<br>Duration: 24-month duration.                                                                                                                                                                                                                                                              | Primary outcome: Housing stability.<br>Secondary outcomes: health measures, social functioning and quality of life, health service use.                                                                                             |
| Stergiopoulos et al. (2015a) [94]<br><br>Canada       | Investigate impact of scattered-site housing with intensive case management on housing stability and other measures for adults experiencing homelessness and mental health issues with moderate support needs.      | Participants: Adults experiencing homelessness and mental illness with moderate support needs, with or without substance use.<br>SS: 1198.<br>RR: 92.2% (12 months), 84.8% (24 months).                                      | Country of birth; Race/Ethnicity.             | Study type: Randomized trial.<br>Data collection: 3-monthly.<br>Collection method: Interviews.<br>Ethical approval: Yes                                                              | Intervention: Scattered-site housing and off-site intensive case management services.<br>Duration: 24-months.                                                                                                                                                                                                                                            | Primary outcome: housing stability.<br>Secondary outcome: generic quality of life.                                                                                                                                                  |
| Stergiopoulos et al. (2016) [95]                      | Determine effectiveness of a Housing First program with anti-racism and anti-oppression practices for adults experiencing homelessness and mental                                                                   | Participants: Adults from ethnic minorities, experiencing homelessness and mental health issues, living in Toronto.<br>SS: 237.<br>RR: 90% (12 months), 79% (24 months).                                                     | Ethnicity; Country of birth.                  | Study type: Randomized control trial.<br>Data collection: 3-month intervals; at 6, 12, 18, 24 months.<br>Collection method: Interviews.                                              | Intervention: Housing First enhanced with anti-racism and anti-oppression practices.<br>Duration: 24-months.                                                                                                                                                                                                                                             | Primary outcome: Housing stability.<br>Secondary outcomes: health measures, social measures, services utilization.                                                                                                                  |

| Author/ Year/ Country                              | Aim                                                                                                                                                                             | Participants/Sample size (SS)/Response rate (RR)                                                                                                                                                                                              | Cultural and Linguistic categorization | Evaluation/Research Design/Methods                                                                                                                                          | Intervention type/Duration                                                                                                                                                                        | Outcome measures                                                                                                                                                                                                          |
|----------------------------------------------------|---------------------------------------------------------------------------------------------------------------------------------------------------------------------------------|-----------------------------------------------------------------------------------------------------------------------------------------------------------------------------------------------------------------------------------------------|----------------------------------------|-----------------------------------------------------------------------------------------------------------------------------------------------------------------------------|---------------------------------------------------------------------------------------------------------------------------------------------------------------------------------------------------|---------------------------------------------------------------------------------------------------------------------------------------------------------------------------------------------------------------------------|
| Canada                                             | health issues from diverse ethnic minority backgrounds.                                                                                                                         |                                                                                                                                                                                                                                               |                                        | Ethical approval: Yes                                                                                                                                                       |                                                                                                                                                                                                   |                                                                                                                                                                                                                           |
| Stergiopoulos et al. (2019) [96]<br>Canada         | Evaluate impact of Housing First on accommodation and health outcomes for people experiencing homelessness and mental health issues.                                            | Participants: People experiencing homelessness and mental health issues, with or without substance use disorder.<br>SS: 378.<br>RR: 81% (phase 1); 88% (phase 2).                                                                             | Country of birth; Ethno-racial status. | Study type: Randomized control trial.<br>Data collection: 3, 6 and 12 months.<br>Collection method: Interviews.<br>Ethical approval: Yes                                    | Intervention: Housing First.<br>Duration: 72-months.                                                                                                                                              | Primary outcome: Housing stability.<br>Secondary outcomes: quality of life, (e.g. community functioning, substance use).                                                                                                  |
| Thompson et al. (2017) [52]<br>United Kingdom      | Describe intervention with men residing in London from the Horn of Africa experiencing psychosocial issues.                                                                     | Participants: Men from the Horn of Africa, experiencing homelessness, living in London.<br>SS: 20.<br>RR: 9.                                                                                                                                  | Country of origin; refugee status.     | Study type: Interventional study design.<br>Collection method: Observational data.<br>Ethical approval: Not recorded.                                                       | Intervention: Men’s group with a mental health and housing focus.<br>Duration: 8-weeks.                                                                                                           | Attendance; group interactions; perspectives of participants on housing issues, group logistics and benefits.                                                                                                             |
| Travis et al. (2019) [74]<br>United States         | Explore effect of a Hip-Hop based program in adults experiencing homelessness and severe mental illness in a shelter setting.                                                   | Participants: Adults experiencing homelessness and severe mental illness in a shelter setting.<br>SS: Not reported. Study site area had a population of people experiencing homelessness of approximately 50,000 - 100,000<br>RR: not stated. | No classification specified.           | Study type: Qualitative - design not formally identified.<br>Collection method: Observation; Document analysis.<br>Ethical approval: Yes                                    | Intervention: Hip Hop Self-Expression group. Group based pilot program, built on the MUZUZE Hip Hop and empowerment framework.                                                                    | Primary outcomes: Social- emotional learning indicators (self-awareness and social awareness).<br>Secondary outcomes: empowerment- based positive youth development indicators (e.g., connection and sense of community). |
| Tsai et al. (2012) [75]<br>United States           | Examine if supported housing leads to improvements in social integration for adults experiencing homelessness.                                                                  | Participants: Adults experiencing homelessness and mental health issues, participating in the Collaborative Initiative to Help End Chronic Homelessness.<br>SS: 550.<br>RR: 73%.                                                              | Race.                                  | Study type: Longitudinal.<br>Data collection: Baseline; 6, 12-month post.<br>Collection method: Quantitative data (survey items).<br>Ethical approval: Not recorded.        | Intervention: Collaborative Initiative to Help End Homelessness.<br>Duration: 12-months.                                                                                                          | Primary outcome: social integration (housing, work, social support, community participation, civic activity, religious faith).<br>Clinical status (mental disorder; substance use disorder).                              |
| Tsemberis & Eisenberg (2000) [62]<br>United States | Explore impact of the Pathways to Housing supported housing program.                                                                                                            | Participants: People with mental illness experiencing homelessness, living on the street.<br>SS: 1841.<br>RR: not reported.                                                                                                                   | Ethnicity.                             | Study type: Comparative study.<br>Collection method: Record of housing tenure.<br>Ethical approval: Not recorded.                                                           | Intervention: Pathways to Housing.<br>Duration: 57-months.                                                                                                                                        | Housing status, mental health symptoms, alcohol and substance use, social networks, housing satisfaction.                                                                                                                 |
| Tsemberis et al. (2004) [63]<br>United States      | Explore impacts of Housing First for people experiencing homelessness and psychiatric illness on a range of outcomes related to choice, mental health, and housing.             | Participants: Individuals with mental illness experiencing homelessness who had spent at least half of their time on the street or in shelters in the almost 30 days.<br>SS: 225.<br>RR: 88% (6 months), 78% (24 months).                     | Race/Ethnicity.                        | Study type: Randomized control trial.<br>Data collection: 6-monthly for 24 months.<br>Collection method: Interview.<br>Ethical approval: Yes                                | Intervention: Housing First.<br>Duration: 24-months.                                                                                                                                              | Consumer choice, stability of housing, substance use and interventions, mental health symptoms.                                                                                                                           |
| Tucker et al. (2017) [76]<br>United States         | Evaluate effectiveness of a group-based motivational interviewing program on alcohol and substance use and sexual health practices among people experiencing homelessness.      | Participants: Young adults, aged 18-25 experiencing homelessness, in Los Angeles County, seeking services at one of two drop-in centre study sites.<br>SS: 200.<br>RR: 48% (full program), 79% (multiple sessions).                           | Race/Ethnicity.                        | Study type: Randomized control trial.<br>Data collection: Baseline; 3 months post.<br>Collection method: Surveys.<br>Ethical approval: Not recorded.                        | Intervention: AWARE: a group-centered Motivational Interviewing program.<br>Duration: 16-weeks.                                                                                                   | Alcohol and substance use-related outcomes, sexual health-related outcomes, fidelity, acceptability measures.                                                                                                             |
| Urbanoski et al. (2017) [98]<br>Canada             | Determine whether substance use disorders modify the effectiveness of a Housing First intervention.                                                                             | Participants: Adults experiencing homelessness or housing precarity, with a mental disorder, living in Canada.<br>SS: 2255.<br>RR: 95.5%                                                                                                      | Ethno-racial minority status.          | Study type: Randomized control trial.<br>Data collection: Baseline; 6-monthly for 21 or 24 months.<br>Collection method: Interviews.<br>Ethical approval: Yes.              | Intervention: Housing First with Intensive Case Management or assertive community treatment.<br>Duration:21-months.                                                                               | Primary outcomes: days in housing, community functioning.<br>Secondary outcomes: quality of life, mental health symptoms.                                                                                                 |
| Volk et al. (2016) [99]<br>Canada                  | Identify characteristics of people who experience housing instability at 12 months post- entering Housing First.                                                                | Participants: Adults experiencing homelessness and mental illness.<br>SS: 1162.<br>RR: 100%.                                                                                                                                                  | Ethno-racial status.                   | Study type: Randomized controlled trial.<br>Data collection: 3-monthly for 12 months.<br>Collection method: Interview; housing stability data.<br>Ethical approval: Yes.    | Intervention: Housing First.<br>Duration: 24-months.                                                                                                                                              | Primary outcome: Housing stability.<br>Predictors: community functioning, mental disorders, community psychological integration, quality of life, healthcare use, social services use, justice system use.                |
| Walter et al. (2019) [77]<br>United States         | Assess changes in health and health care utilisation amongst Latinx adults with mental illness and substance use taking part in integrated behavioural and primary health care. | Participants: Latinx adults experiencing homelessness, living in the USA.<br>SS: 107.<br>RR: 100%                                                                                                                                             | Race; Latinx status; Ethnic group.     | Study type: Longitudinal.<br>Data collection: Baseline; 6, 12 months.<br>Collection method: Interviews.<br>Ethical approval: Yes.                                           | Intervention: CasaCare (Person-Centered Health Home) - culturally tailored medical, behavioural and wellness supports, services to address social determinants of health.<br>Duration: 12-months. | Primary outcomes: depression and anxiety, substance use.<br>Secondary outcomes: healthcare utilization, homelessness status.                                                                                              |
| Wenzel et al. (2009) [64]<br>United States         | Address co-occurrence of alcohol and other drug use, HIV risk behaviours, and intimate partner violence in women experiencing homelessness.                                     | Participants: Women experiencing homelessness, aged 18-25, in Los Angeles County, who spoke/understood English.<br>SS: 31.<br>RR: 87%.                                                                                                        | Ethnicity.                             | Study type: Pilot group program.<br>Collection method: Questionnaires; Focus groups; Feedback sessions.<br>Ethical approval: Yes.                                           | Intervention: The Power of YOU: group addressing alcohol, substance use, HIV risk behaviours, partner violence.<br>Duration: 5-months.                                                            | Alcohol intoxication, number of male sex-partners, intimate partner violence.<br>Satisfaction, enjoyment of sessions.                                                                                                     |
| Wenzel et al. (2019) [78]<br>United States         | Investigate experiences of discrimination in individuals who moved into permanent supportive housing.                                                                           | Participants: Adults experiencing homelessness, moving to permanent supportive housing.<br>SS: 421.<br>RR: 90.9%.                                                                                                                             | Race/Ethnicity.                        | Study type: Longitudinal.<br>Data collection: Before/within 5 days of move-in; 3, 6, 12 months after moving in.<br>Collection method: Interviews.<br>Ethical approval: Yes. | Intervention: Permanent supportive housing.<br>Duration: 12-months.                                                                                                                               | Experiences of discrimination, perceived reasons for discrimination.                                                                                                                                                      |
| Winiarski et al. (2020) [79]<br>United States      | Describe development of shelter-based clinical model for youth experiencing homelessness and evaluate its outcomes on service utilization.                                      | Participants: Young people experiencing homelessness, who attended a shelter-based clinic in a Midwestern city.<br>SS: 77.<br>RR: 49.4% (first session), 13% (second session).                                                                | Race and Ethnicity.                    | Study type: Cross-sectional evaluation.<br>Data collection: Intake.<br>Collection method: Clinician rating forms.<br>Ethical approval: Yes.                                 | Intervention: Shelter-based mental health clinic involving free psychology and psychiatry sessions.<br>Duration: 24-months.                                                                       | Mental health service utilization, mental health status of homeless youth.                                                                                                                                                |
